# Supplementary material
Source: PubMed Central journal article supplement (PMC4511207)
Supplement: supp_fj.14-269720_Supplemental_Figure1.pdf [file supp_fj.14-269720_Supplemental_Figure1.pdf]

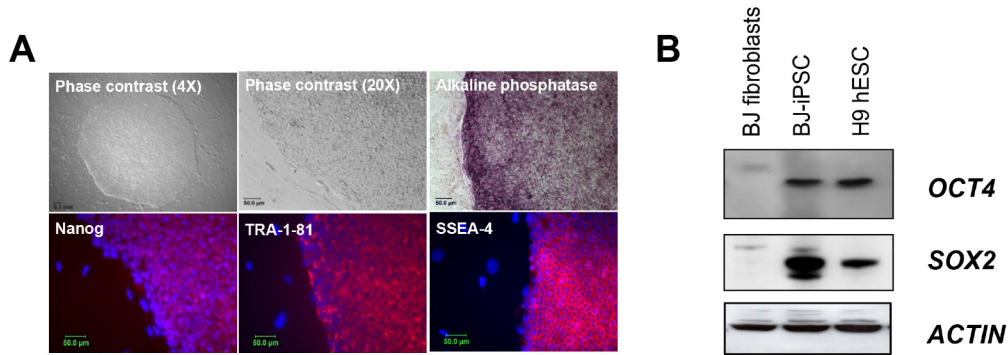

**Supplemental Figure S1.** *In vitro* characterization of hiPSC. (A) Characteristic morphology, alkaline phosphatase staining and immunofluorescence staining for pluripotency markers- Nanog, TRA-1-81 and SSEA-4 for hiPSC. Nuclei (blue) are stained with DAPI (Scale Bar, 50 $\mu$ m), (B) Western blot analyses for protein levels of representative pluripotency markers, Oct4 and Sox2 in hiPSC in comparison to human ESC (H9).

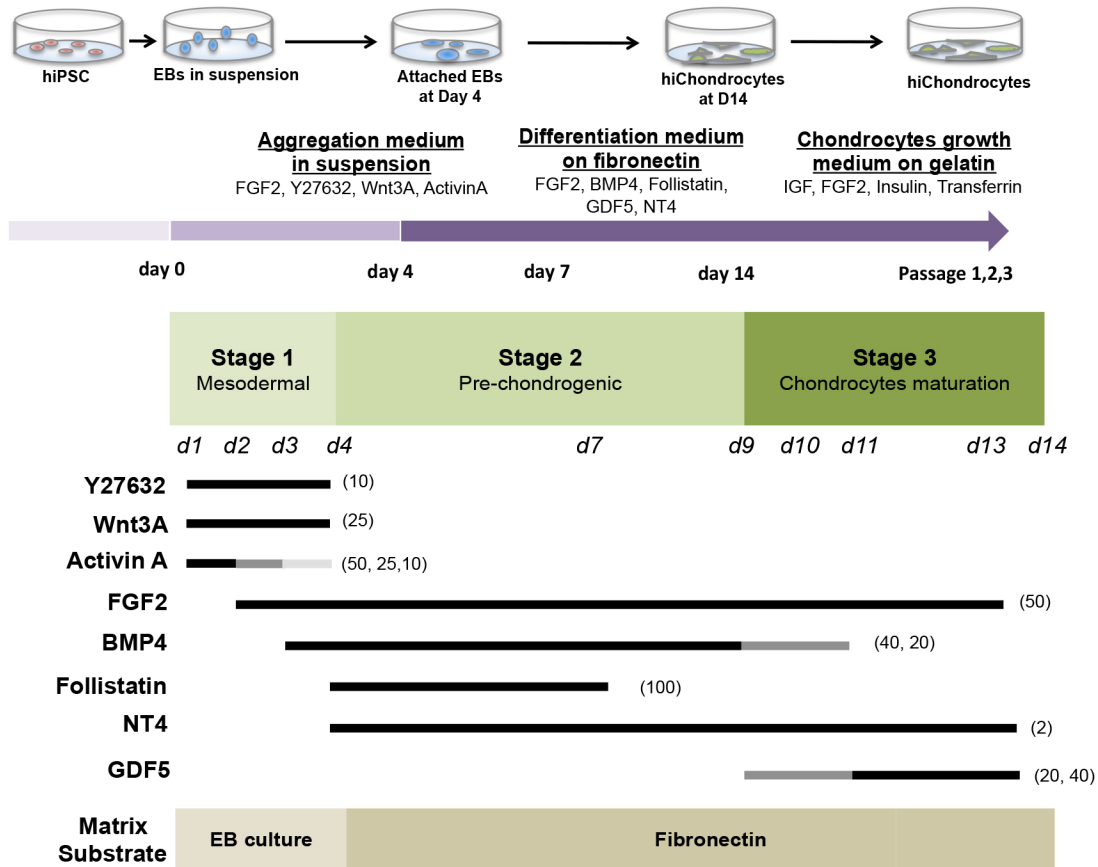

**Supplemental Figure S2.** Defined growth factors-based protocol for chondrogenic differentiation of hiPSC. Units for Y27632 are in  $\mu$ M, all the other units are in ng/mL.
