# Supplementary material
Source: PubMed Central journal article supplement (PMC4511207)
Supplement: supp_fj.14-269720_Supplemental_Figure2.pdf [file supp_fj.14-269720_Supplemental_Figure2.pdf]

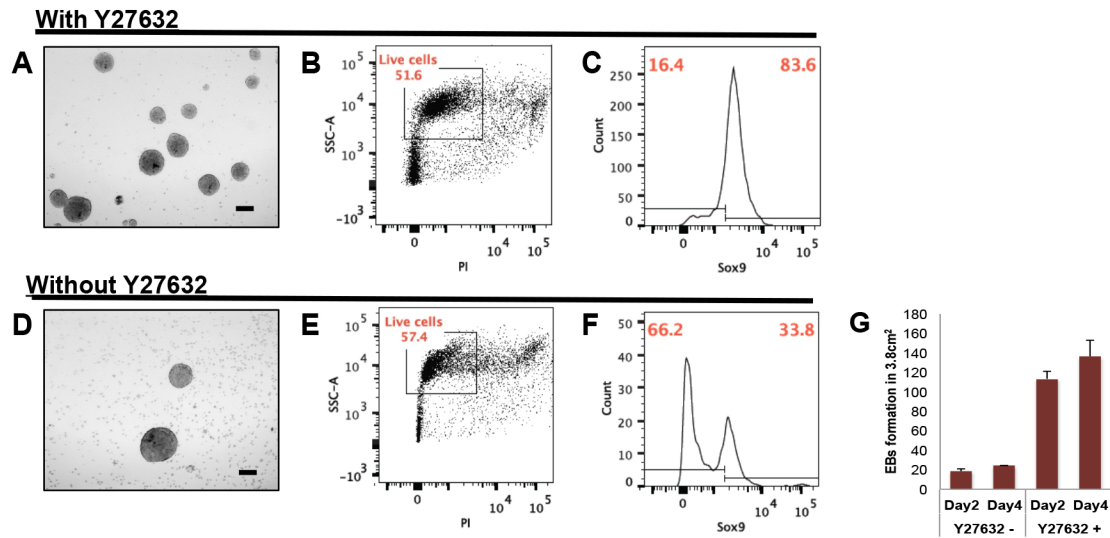

**Supplemental Figure S3. Addition of ROCK inhibitor (Y27632) increased Sox9 positive cells during early chondrogenic differentiation.** (A, D, G) Addition of ROCK inhibitor enhanced embryoid body (EB) formation at days 2 and 4 of differentiation (Bar scale, 100 $\mu$ m), (B, C, E, F) Addition of ROCK inhibitor for 4 days of chondrogenic differentiation markedly increased Sox9 expression (C and F) in differentiating cells (B and E).

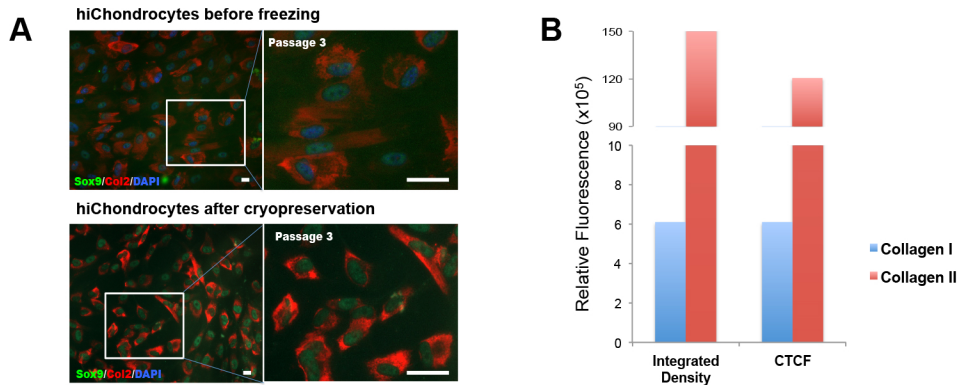

**Supplemental Figure S4.** (A) Representative immunofluorescence staining of chondrocyte markers, Sox9 and Collagen II (Col2a1) (Scale bar, 100 $\mu$ m) upon passaging and after cryopreservation, (B) Measuring fluorescence intensity (CTCF, corrected total cell fluorescence) for staining of Collagen I and Collagen II (Fig 2A) using Image J.

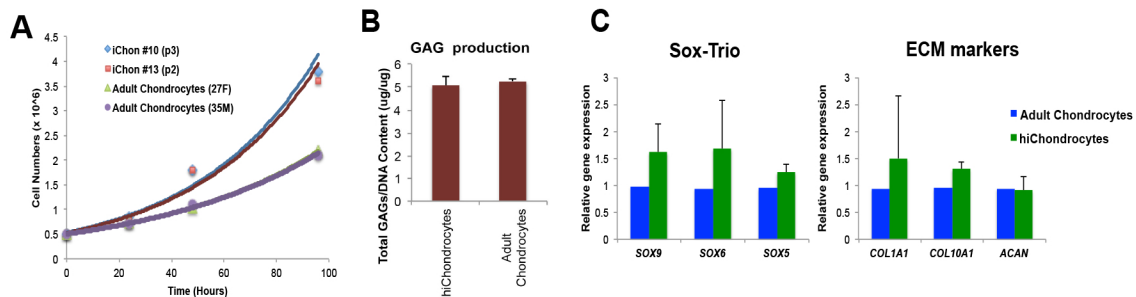

**Supplemental Figure S5.** (A) Cell growth of hiChondrocytes (#10 and #13) in comparison to adult chondrocytes (27-year old Female and 35-year old male) at 0, 4, 48 and 96 hours and the doubling times calculated, (B) GAG content in the CS-PEG hydrogels normalized to DNA content, (C) Quantitative gene expression of chondrogenic (Sox9, Sox6 and Sox5) and ECM markers (Col2a1, Col10a1 and Aggrecan) in CS-PEG hydrogels seeded with hiChondrocytes or adult chondrocytes (n=3, mean  $\pm$  s.d, Data represent gene expression relative to adult chondrocytes).
