# Supplementary material
Source: PubMed Central journal article supplement (PMC4511207)
Supplement: supp_fj.14-269720_Supplemental_Figure3.pdf [file supp_fj.14-269720_Supplemental_Figure3.pdf]

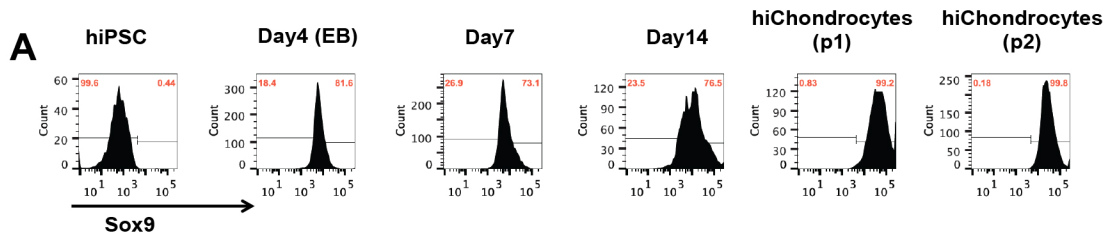

**B** Sox9 positive population during chondrocyte differentiation (%)

|                           | hiPSC       | Day 4        | Day 7        | Day 14       | hiChondrocytes (p1) |
|---------------------------|-------------|--------------|--------------|--------------|---------------------|
| Differentiation #1        | 0.00        | 81.60        | 73.10        | 76.50        | 99.20               |
| Differentiation #3        | 0.00        | 85.30        | 77.20        | 80.50        | 99.40               |
| Differentiation #4        | 0.00        | 64.20        | 64.40        | 80.30        | 97.50               |
| Differentiation #7        | 0.00        | 76.30        | 65.40        | 85.30        | 92.60               |
| Differentiation #10       | 0.00        | 67.20        | 59.30        | 89.60        | 96.00               |
| <b>Average</b>            | <b>0.00</b> | <b>74.92</b> | <b>67.88</b> | <b>82.44</b> | <b>96.94</b>        |
| <b>Standard deviation</b> | <b>0.00</b> | <b>9.07</b>  | <b>7.18</b>  | <b>5.08</b>  | <b>2.79</b>         |

**Supplemental Figure S6.** (A) Single cell FACS analyses for Sox9-expressing cell populations during chondrogenic differentiation of hiPSC, (B) Assessment of Sox9-positive population (%) during chondrocyte differentiation for different batches of hiPSC to ascertain the reproducibility of the differentiation protocol. Differentiation #1, #3 and #4 are from lentiviral-induced hiPSC and #7 and #10 are from retroviral-induced hiPSCs.

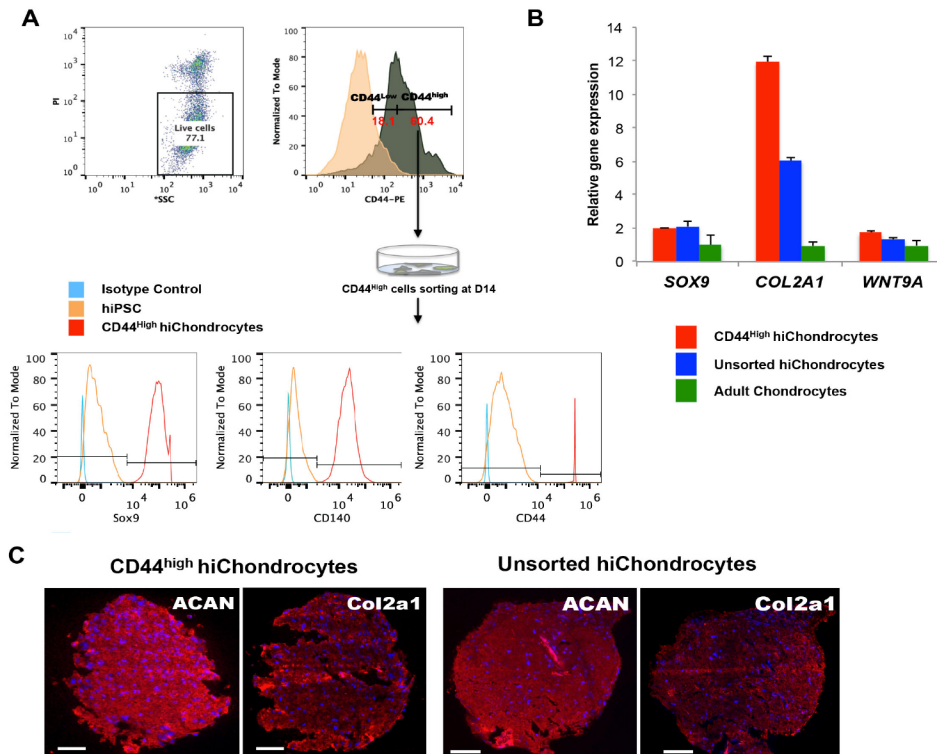

**Supplemental Figure S7.** (A) FACS sorting (at Day 14 of differentiation), expansion and characterization of CD44<sup>high</sup> hiPSC-derived chondrocytes (CD44<sup>high</sup> hiChondrocytes) after 14 days post sorting. (B) Quantitative gene expression for Sox9, Col2a1 and Wnt9a and (C) Immunofluorescence staining for Aggrecan and Col II expression after *in vitro* cartilage tissue formation from CD44<sup>high</sup> hiChondrocytes and unsorted hiChondrocytes.
