# Supplementary material
Source: PubMed Central journal article supplement (PMC4511207)
Supplement: supp_fj.14-269720_Supplemental_Figure4.pdf [file supp_fj.14-269720_Supplemental_Figure4.pdf]

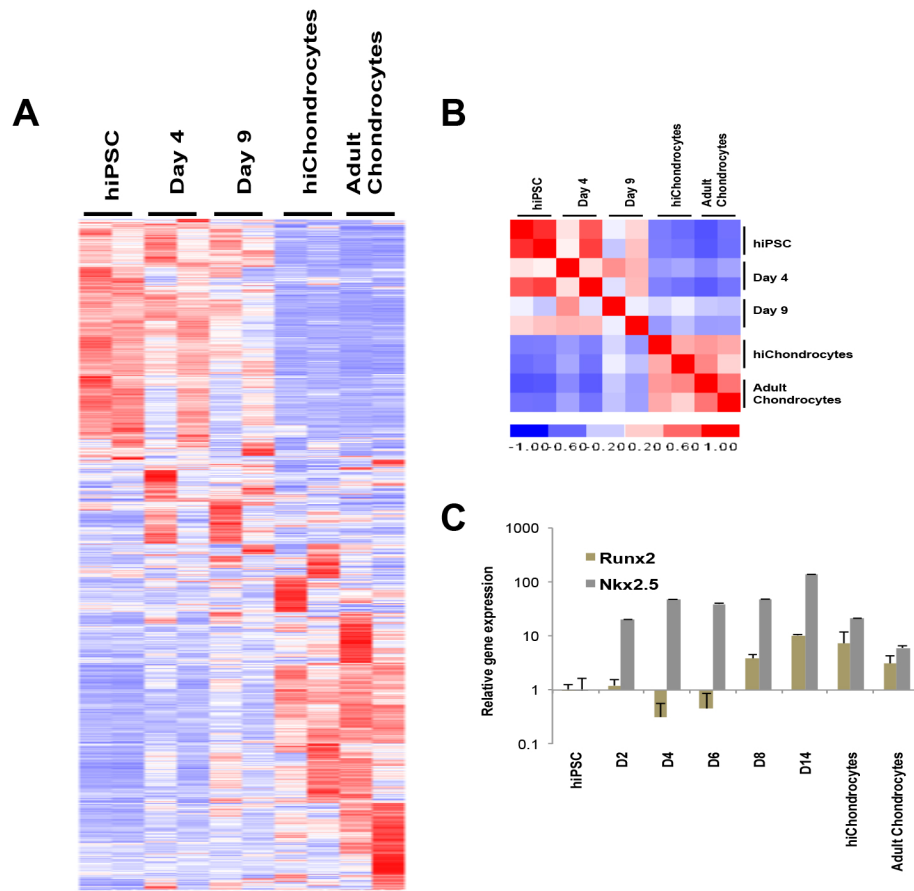

**Supplemental Figure S8.** (A) Heatmap of whole genome-wide gene expression at different stages (Day 4 and Day 9) during hiPSC differentiation to hiChondrocytes and comparison with undifferentiated hiPSC and adult chondrocytes (n=2 biological replicates), (B) Pearson correlation analyses showing the functional correlation between undifferentiated hiPSC, differentiating populations at days 4 and 9, hiChondrocytes and adult chondrocytes. Red represents higher correlation while blue indicates lower correlation, (C) Quantitative real time PCR for Runx2 and Nkx2.5 expression during chondrogenic differentiation of hiPSC validating microarray data (n=3, mean  $\pm$  s.d., Data presented as gene expression relative to hiPSC).
